# Supplementary material for: Roles of hydroxyl and carbonate radicals in bisphenol a degradation via a nanoscale zero-valent iron/percarbonate system: influencing factors and mechanisms
Source: Royal Society of Chemistry journal article supplement (doi:10.1039/d0ra08395j), 2021-01-01
Supplement: d0ra08395j1.pdf [file d0ra08395j1.pdf]

1 *Supporting Information*

2  
3 **Roles of hydroxyl and carbonate radicals in bisphenol A degradation via**  
4 **nanoscale zero-valent iron/percarbonate system: Influencing factors and**  
5 **mechanisms**

6 Yulun Xiao,<sup>a,b</sup> Xiang Liu,<sup>c</sup> Ying Huang,<sup>d</sup> Wei Kang,<sup>e</sup> Zheng Wang,<sup>b,c</sup> and Han Zheng<sup>\*b</sup>

7 <sup>a</sup> *Faculty of science, Monash University, Clayton, VIC, 3800, Australia.*

8 <sup>b</sup> *Hubei Key Laboratory of Mine Environmental Pollution Control and Remediation, Hubei Polytechnic*  
9 *University, Huangshi, 435003, China.*

10 <sup>c</sup> *School of Environmental Studies, China University of Geosciences, Wuhan 430074, China*

11 <sup>d</sup> *College of Chemical and Biological Engineering, Key Laboratory of Biomass Chemical Engineering of*  
12 *Ministry of Education, Zhejiang University, Hangzhou 310027, China.*

13 <sup>e</sup> *School of Environmental Science and Engineering, Hubei Polytechnic University, Huangshi, 435003, China.*

14  
15 \*Corresponding author.

16 **Han Zheng**

17 Email: [zhenghan@hbpu.edu.cn](mailto:zhenghan@hbpu.edu.cn); Tel: (+86)-0714-6348671; Fax: (+86)-0714-634828

### **Synthesis of nZVI catalyst.**

The nZVI particle was synthesized by the liquid phase reduction method. Firstly, 100 mL deoxygenated water was added to a three-neck flask (250 mL), followed by adding  $\text{FeSO}_4 \cdot 7\text{H}_2\text{O}$  (0.01 mol) and dissolving with the magnetic stirring. Then, 50 mL  $\text{NaBH}_4$  solution (0.03 mol) was gradually dripped into the above solution. The mixture was mechanically stirred for 30 min. The entire reaction process was carried out in  $\text{N}_2$  circumstance at room temperature ( $25 \pm 2$  °C). After the reaction, the black particles were separated by an external magnet and then washed three times with deoxygenated water and anhydrous ethanol, respectively. After that, the products were dried in vacuum at 50 °C for 12 h. Finally, the dried nZVI particles were sealed and stored in an anaerobic glove box filled with  $\text{N}_2$  for the further use.

**Table. S1:** Identified main transformation products (TPs) of BPA in the nZVI/SPC system.

| No. | Compound                                   | Structure                                                                          | Formula                                        | M.W. | ESI <sup>-</sup> (m/z) |
|-----|--------------------------------------------|------------------------------------------------------------------------------------|------------------------------------------------|------|------------------------|
| 1   | Bisphenol A<br>(BPA)                       | 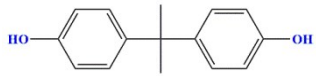 | C <sub>15</sub> H <sub>16</sub> O <sub>2</sub> | 228  | 227                    |
| 2   | Monohydroxylated BPA<br>(B1)               |  | C <sub>15</sub> H <sub>16</sub> O <sub>3</sub> | 244  | 243                    |
| 3   | Dihydroxylated BPA<br>(B2)                 |  | C <sub>15</sub> H <sub>16</sub> O <sub>4</sub> | 260  | 259                    |
| 4   | P-isopropylphenol<br>(B3)                  |   | C <sub>9</sub> H <sub>12</sub> O <sub>2</sub>  | 152  | 151                    |
| 5   | 1-(2,4-dihydroxyphenyl)ethan-1-one<br>(B4) |   | C <sub>8</sub> H <sub>8</sub> O <sub>3</sub>   | 152  | 151                    |

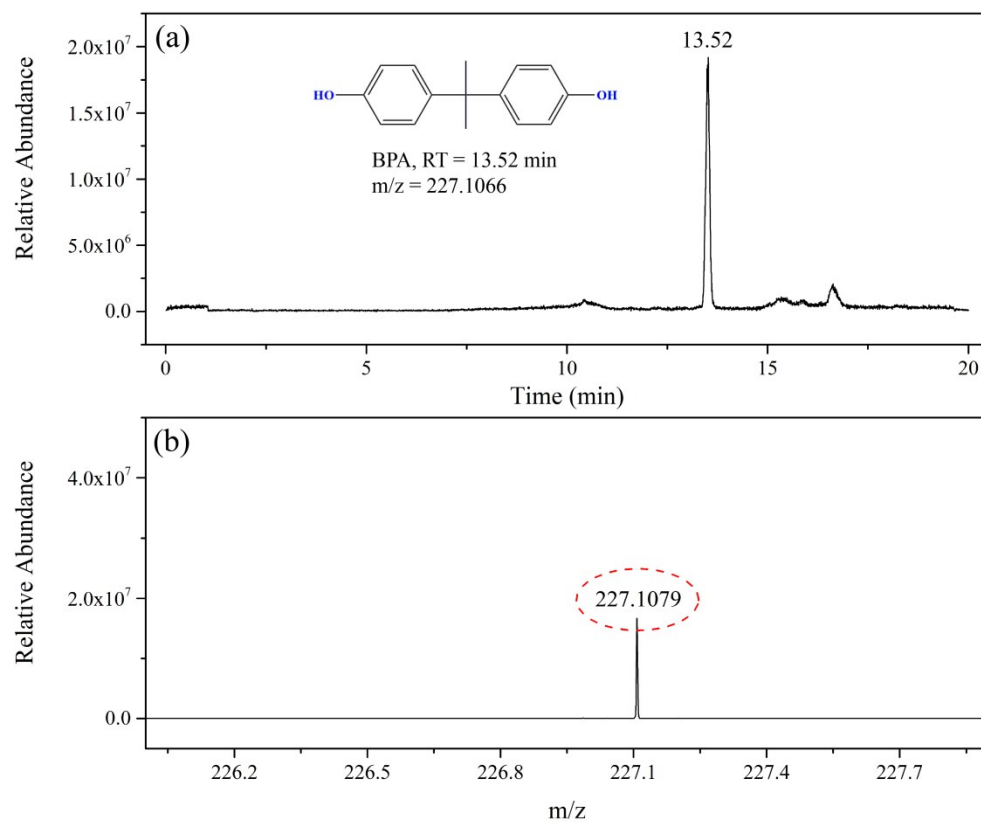

**Fig. S1:** (a) LC spectra and (b) mass spectra of BPA in the nZVI/SPC system.

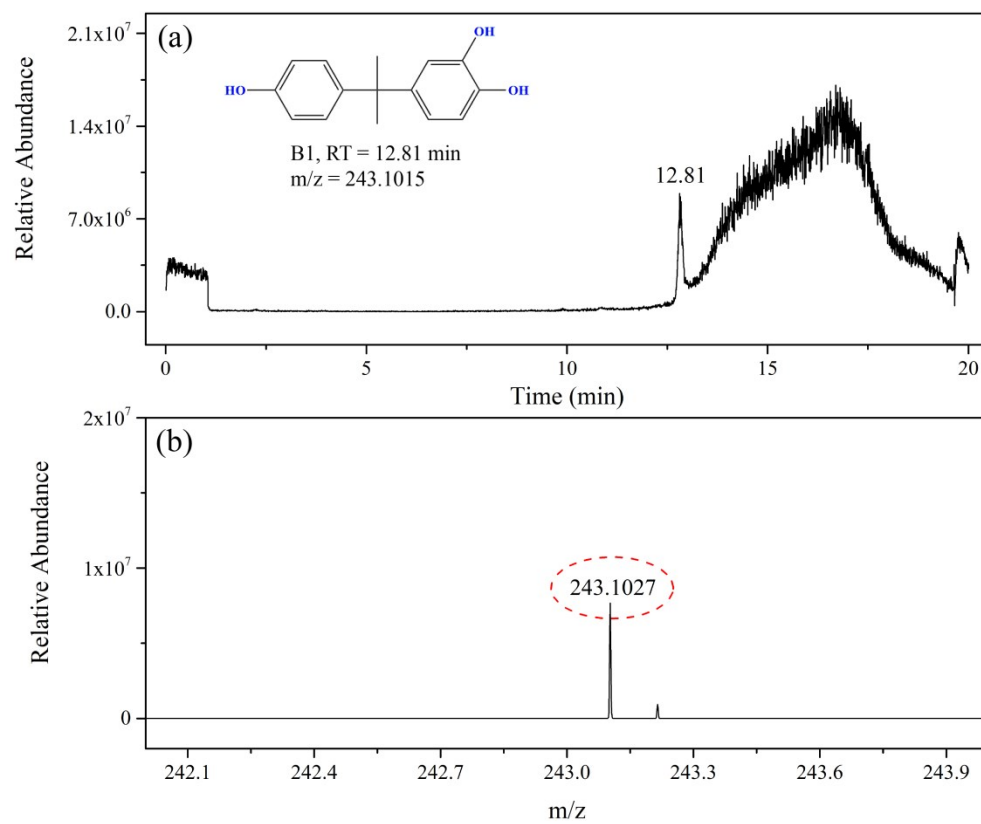

**Fig.S2:** (a) LC spectra and (b) mass spectra of TPs (B1) in the nZVI/SPC system.

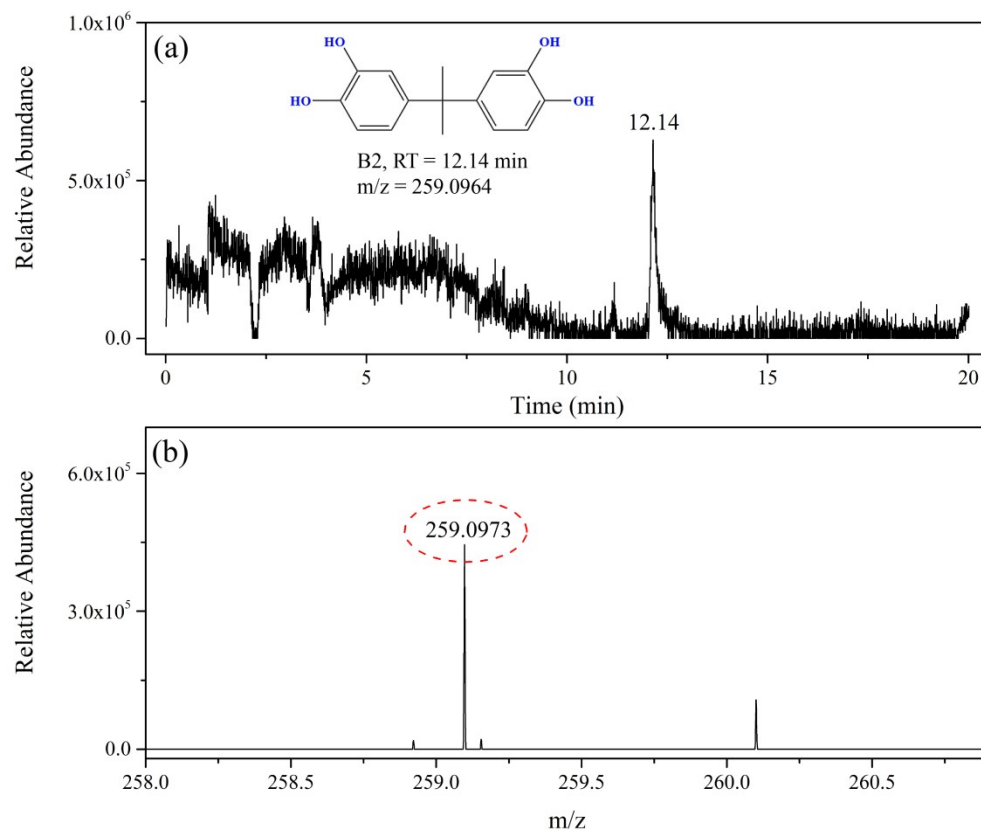

**Fig.S3:** (a) LC spectra and (b) mass spectra of TPs (B2) in the nZVI/SPC system.

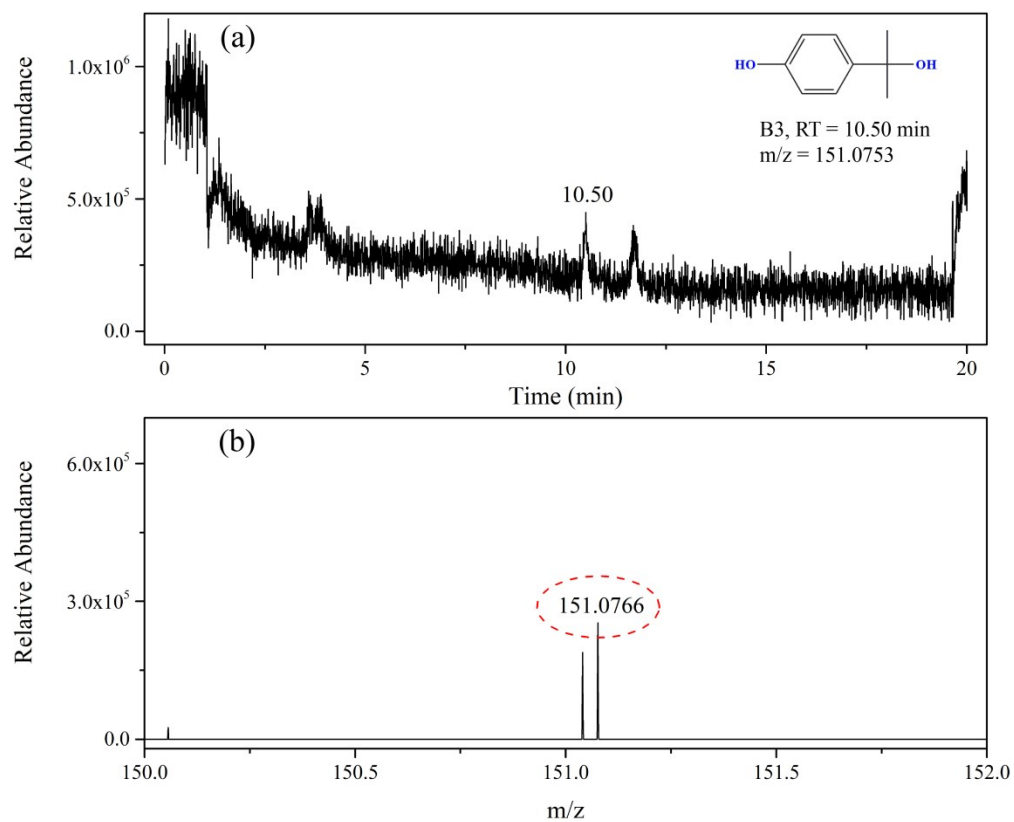

**Fig.S4:** (a) LC spectra and (b) mass spectra of TPs (B3) in the nZVI/SPC system.

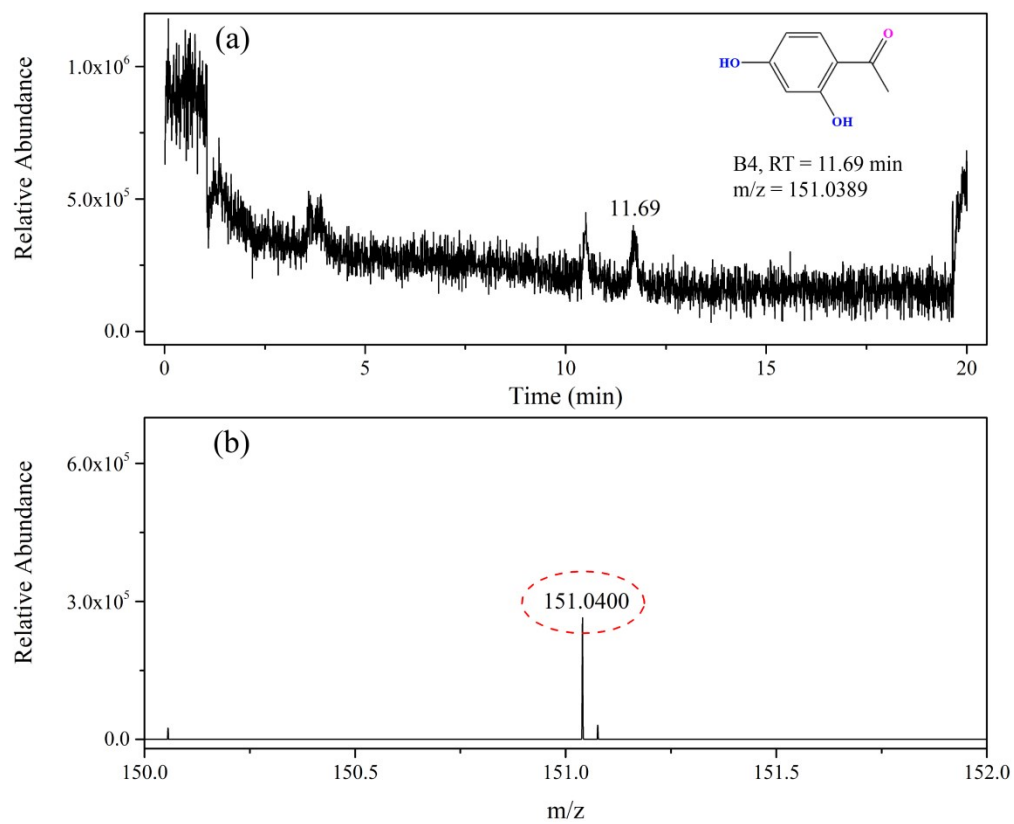

**Fig.S5:** (a) LC spectra and (b) mass spectra of TPs (B4) in the nZVI/SPC system.
